# Supplementary material for: Evaluating the impact of blowing-snow sea salt aerosol on springtime BrO and O 3 in the Arctic
Source: Copernicus journal article supplement (doi:10.5194/acp-20-7335-2020), 2020-06-25
Supplement: Supplementary file 1 [file acp-20-7335-2020-supplement.pdf]

Supplement of Atmos. Chem. Phys., 20, 7335–7358, 2020  
<https://doi.org/10.5194/acp-20-7335-2020-supplement>  
© Author(s) 2020. This work is distributed under  
the Creative Commons Attribution 4.0 License.

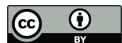

*Supplement of*

## **Evaluating the impact of blowing-snow sea salt aerosol on springtime BrO and O<sub>3</sub> in the Arctic**

**Jiayue Huang et al.**

*Correspondence to:* Lyatt Jaeglé (jaegle@uw.edu)

The copyright of individual parts of the supplement might differ from the CC BY 4.0 License.

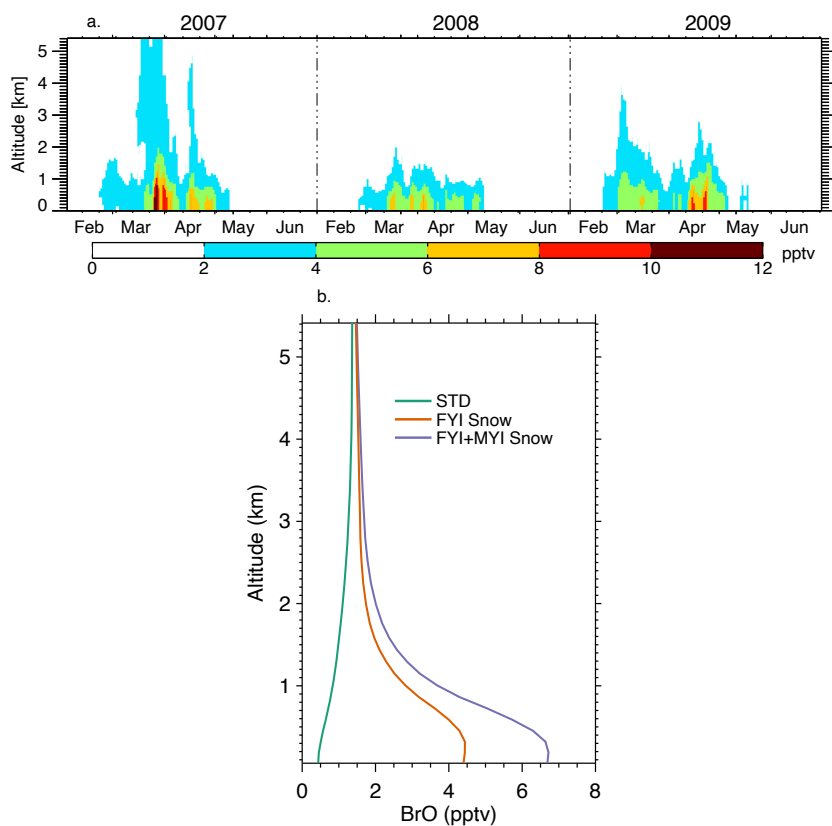

Figure S1: (a) Timeseries of daily BrO mixing ratio (in pptv) averaged poleward of 60° N in the GEOS-Chem FYI+MYI Snow simulation between February and June for 2007–2009. Note that the model is sampled between 9 and 11 am local time. (b) Mean vertical profile of BrO (9-11 am local time) averaged poleward of 60° N for March and April 2007-2009 in the STD simulation (green line), FYI Snow simulation (red), and FYI+MYI simulation (purple).

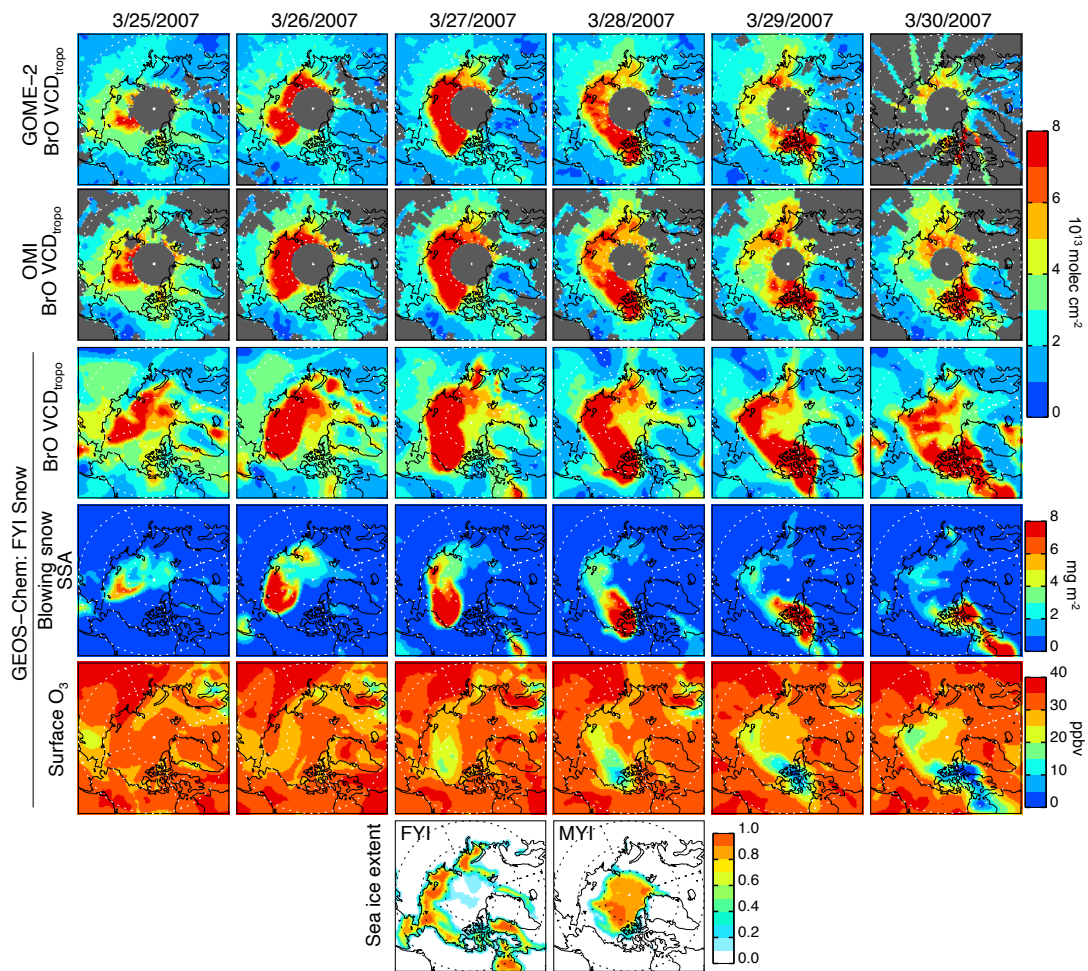

Figure S2: Same as Figure 5, but showing the results of the GEOS-Chem FYI Snow simulation for 25-30 March 2007.
